# Supplementary material
Source: publisher figshare collection journal article supplement (https://gsajournals.figshare.com/ndownloader/files/29157474)
Supplement: Supplementary file 1 [file 29157474]

Table S6. Reproductive phenotypes in CC and inbred founder strains.
Strain	source	DOB	Sex	SAC_Date	Age_at_sac	BodyWeight	AvgLitterSizeAtWean	L_testis	R_testis	Testis_Avg (mg)	Std_Testis_Avg (mg/g)	Sperm Density (cells/mL)	% normal sperm	% motile sperm	AverageTubuleArea (mm2)	Number tubules per cross section	Number tubules with vacuoles	Number tubules with apoptotic cells	sex_ratio	lowerCI	upperCI	binomP	sig
CC032/GeniUnc	This study	10/1/19	M	12/31/19	91	36.886	4.463768116	67.2	68.1	67.65	1.834029171	NA			0.031912	191	17	42	0.3139159	0.2841329	0.3448865	2.83E-30	1
CC032/GeniUnc	This study	10/1/19	M	12/31/19	91	22.647	4.463768116	72.9	73.2	73.05	3.225592794	NA			0.034258	270.5	36.5	32	0.3139159	0.2841329	0.3448865	2.83E-30	1
CC032/GeniUnc	This study	10/1/19	M	12/31/19	91	30.621	4.463768116	64.6	71.5	68.05	2.22233108	NA							0.3139159	0.2841329	0.3448865	2.83E-30	1
CC026/GeniUncJ	This study	10/22/19	M	1/7/20	77	34.374	3.593220339	185.2	100.1	142.65	4.149938907	NA							0.5539305	0.523906	0.5836642	0.000399433	2
CC026/GeniUncJ	This study	10/22/19	M	1/7/20	77	37.064	3.593220339	113.3	114.8	114.05	3.077109864	NA							0.5539305	0.523906	0.5836642	0.000399433	2
CC026/GeniUncJ	This study	10/22/19	M	1/7/20	77	31.033	3.593220339	25.8	25.2	25.5	0.821705926	NA							0.5539305	0.523906	0.5836642	0.000399433	2
CC004/TauUnc	Lazear		M		125		4.095238095			62		0							0.4855206	0.4609423	0.5101514	0.2535204	0
CC005/TauUnc	Lazear		M		125		4.142857143			68		5500000		27.3					0.509476	0.4762185	0.5426711	0.5932108	0
CC012/GeniUnc	Lazear		M		125		3.819277108			123		17700000		37.9					0.4700103	0.4475679	0.4925438	0.008905882	1
CC012/GeniUnc	Lazear		M		125		3.819277108			98		0							0.4700103	0.4475679	0.4925438	0.008905882	1
CC012/GeniUnc	Lazear		M		125		3.819277108			98		0							0.4700103	0.4475679	0.4925438	0.008905882	1
CC028/GeniUnc	Lazear		M		125		4			93		8100000		30.9					0.4087591	0.3794768	0.4385326	1.67E-09	1
CC028/GeniUnc	Lazear		M		125		4			54		4100000		9.8					0.4087591	0.3794768	0.4385326	1.67E-09	1
CC028/GeniUnc	Lazear		M		125		4			50		11100000		18.9					0.4087591	0.3794768	0.4385326	1.67E-09	1
CC032/GeniUnc	Lazear		M		125		4.463768116			77		10900000		48.6					0.3139159	0.2841329	0.3448865	2.83E-30	1
CC032/GeniUnc	Lazear		M		125		4.463768116			0		9000000		21.1					0.3139159	0.2841329	0.3448865	2.83E-30	1
CC032/GeniUnc	Lazear		M		125		4.463768116			71		5000000		18					0.3139159	0.2841329	0.3448865	2.83E-30	1
CC036/Unc	Lazear		M		125		3.722222222			93		14900000		24.2					0.4695864	0.4204909	0.5191227	0.2364414	0
CC036/Unc	Lazear		M		125		3.722222222			87		0							0.4695864	0.4204909	0.5191227	0.2364414	0
CC036/Unc	Lazear		M		125		3.722222222			83		0							0.4695864	0.4204909	0.5191227	0.2364414	0
CC040/TauUnc	Lazear		M		125		2.333333333			65		6800000		38.2					0.4559353	0.426362	0.4857422	0.003608884	1
CC040/TauUnc	Lazear		M		125		2.333333333			63		0							0.4559353	0.426362	0.4857422	0.003608884	1
CC041/TauUnc	Lazear		M		125		5.35			65		3600000		2.8					0.5223267	0.4982813	0.5462949	0.06904069	0
CC041/TauUnc	Lazear		M		125		5.35			115		0							0.5223267	0.4982813	0.5462949	0.06904069	0
CC041/TauUnc	Lazear		M		125		5.35			115		0							0.5223267	0.4982813	0.5462949	0.06904069	0
CC046/Unc	Lazear		M		125		3.5			55		7490000		1.3					0.6470588	0.3832837	0.8579025	0.3323059	0
CC046/Unc	Lazear		M		125		3.5			81		0							0.6470588	0.3832837	0.8579025	0.3323059	0
CC059/TauUnc	Lazear		M		125		5.720930233			135		29900000		65.2					0.5215517	0.4985373	0.5444979	0.06666348	0
CC059/TauUnc	Lazear		M		125		5.720930233			148		23200000		30.6					0.5215517	0.4985373	0.5444979	0.06666348	0
CC059/TauUnc	Lazear		M		125		5.720930233			149		14200000		35.2					0.5215517	0.4985373	0.5444979	0.06666348	0
CC068/TauUnc	Lazear		M		125		4.264705882			58		0							0.46373057	0.4317431	0.4944753	0.02092711	1
CC068/TauUnc	Lazear		M		125		4.264705882			73		0							0.46373057	0.4317431	0.4944753	0.02092711	1
CC068/TauUnc	Lazear		M		125		4.264705882			53		0							0.46373057	0.4317431	0.4944753	0.02092711	1
CC072/TauUnc	Lazear		M		125		NA			97		14500000		31.7
CC072/TauUnc	Lazear		M		125		NA			95		13200000		34.8
129S1/SvImJ	Odet; Shorter3		M		125	40.49	5.16			129	3.185971845	30000000			0.05253081	243	6
129S1/SvImJ	Odet; Shorter3		M		125	33.61	5.16			112	3.332341565	27000000	41		0.038234761	179	92
129S1/SvImJ	Odet; Shorter3		M		125	32.55	5.16			119	3.655913978	0	74.8		0.060375998	245	8
129S1/SvImJ	Odet; Shorter3		M		125	26.09	5.16			63	2.414718283	0	55.1		0		0
129S1/SvImJ	Odet; Shorter3		M		125	25.1	5.16			77	3.067729084	5450000	48		0.048687649	146	5
129S1/SvImJ	Odet; Shorter3		M		125	22.65	5.16			114	5.033112583	5630000	38.5		0.055697053	204	3
129S1/SvImJ	Odet; Shorter3		M		125	25.31	5.16			115	4.543658633	6350000	47		0.059577302	227	1
129S1/SvImJ	Odet; Shorter3		M		125	27.53	5.16			111	4.031965129	24250000	55.7		0.053616964	202	2
129S1/SvImJ	Odet; Shorter3		M		125	22.96	5.16			86	3.745644599	0	63.9		0.063641846	190	3
129S1/SvImJ	Odet; Shorter3		M		125	24.96	5.16			110	4.407051282	25000000	74.6		0.057876408	215	2
129S1/SvImJ	Odet; Shorter3		M		125	26.52	5.16			111	4.185520362	15250000	78		0.058826906	196	3
129S1/SvImJ	Odet; Shorter3		M		125	24.83	5.16			108	4.349577124	12250000	67.4		0.064990344	160	6
129S1/SvImJ	Odet; Shorter3		M		125	23.79	5.16			105	4.413619168	12250000	79.8		0.052921523	205	1
129S1/SvImJ	Odet; Shorter3		M		125	21.84	5.16			42	1.923076923	8500000	48.8		0.076081785	72	3
129S1/SvImJ	Odet; Shorter3		M		125	20.93	5.16			111	5.30339226	9500000	65.6		0		0
129S1/SvImJ	Odet; Shorter3		M		125	21.08	5.16			112	5.313092979	8500000	63.4		0.059404376	188	0
129S1/SvImJ	Odet; Shorter3		M		125	24.65	5.16			108	4.381338742	16000000	53.8		0.063454185	171	0
129S1/SvImJ	Odet; Shorter3		M		125	24.29	5.16			109	4.487443392	18000000	56		0.062777345	129	1
129S1/SvImJ	Odet; Shorter3		M		125	29.74	5.16			98	3.295225286	0			0.052905215	179	10
129S1/SvImJ	Odet; Shorter3		M		125	28.64	5.16			116	4.05027933	0			0.061901115	199	2
129S1/SvImJ	Odet; Shorter3		M		125	31.56	5.16			112	3.548795944	0			0.057136835	190	2
129S1/SvImJ	Odet; Shorter3		M		125	31.76	5.16			121	3.809823678	0			0.06176008	217	2
129S1/SvImJ	Odet; Shorter3		M		125	31.69	5.16			121	3.818239192	0			0.0590076	221	3
129S1/SvImJ	Odet; Shorter3		M		125	26.76	5.16			94	3.512705531	0			0.057484777	213	4
129S1/SvImJ	Odet; Shorter3		M		125	26.89	5.16			109	4.053551506	0			0.064602329	171	2
129S1/SvImJ	Odet; Shorter3		M		125	23.67	5.16			127	5.365441487	0			0		0
129S1/SvImJ	Odet; Shorter3		M		125	23.8	5.16			100	4.201680672	10600000			0.055346232	171	15
129S1/SvImJ	Odet; Shorter3		M		125	25.6	5.16			100	3.90625	9100000			0.055881258	205	5
129S1/SvImJ	Odet; Shorter3		M		125	25	5.16			97	3.88	10200000			0.052409009	197	2
129S1/SvImJ	Odet; Shorter3		M		125	21.5	5.16			72	3.348837209	19800000			0.053616964	196	0
129S1/SvImJ	Odet; Shorter3		M		125	25.2	5.16			127	5.03968254	33900000			0.059897877	241	6
129S1/SvImJ	Odet; Shorter3		M		125	25.3	5.16			118	4.664031621	21600000			0.066572312	151	2
129S1/SvImJ	Odet; Shorter3		M		125	26.2	5.16			103	3.93129771	25600000			0.058646488	162	5
129S1/SvImJ	Odet; Shorter3		M		125	23.6	5.16			110	4.661016949	18000000			0.055939933	219	3
129S1/SvImJ	Odet; Shorter3		M		125	23.9	5.16			88	3.682008368	0			0		0
129S1/SvImJ	Odet; Shorter3		M		125	27.2	5.16			122	4.485294118	37800000			0.065144065	187	2
129S1/SvImJ	Odet; Shorter3		M		125		5.16			0		14200000			0		0
129S1/SvImJ	Odet; Shorter3		M		125		5.16			0		13000000			0		0
A/J	Odet; Shorter3		M		125	23.5	4.95			61	2.595744681	1800000			0.035318918	247	33
A/J	Odet; Shorter3		M		125	21.8	4.95			74	3.394495413	6900000			0.042346187	240	5
A/J	Odet; Shorter3		M		125	20.3	4.95			64	3.15270936	8700000			0.034517409	185	6
A/J	Odet; Shorter3		M		125	20.7	4.95			69	3.333333333	5900000			0.036799777	221	6
A/J	Odet; Shorter3		M		125		4.95			0		4500000			0		0
A/J	Odet; Shorter3		M		125		4.95			0		7000000			0		0
A/J	Odet; Shorter3		M		125	28.92	4.95			81	2.800829876	27000000	59.1		0.038442992	210	9
A/J	Odet; Shorter3		M		125	27.22	4.95			80	2.93901543	14760000	57		0.036663897	192	4
A/J	Odet; Shorter3		M		125		4.95			0		9500000			0		0
A/J	Odet; Shorter3		M		125	24.64	4.95			0		0			0		0
A/J	Odet; Shorter3		M		125	25.72	4.95			70	2.721617418	7180000	61.7		0.04002275	203	6
A/J	Odet; Shorter3		M		125	24.97	4.95			72	2.883460152	9300000	62.7		0.039803205	239	5
A/J	Odet; Shorter3		M		125	27.72	4.95			68	2.453102453	9500000	54.4		0.036170067	148	5
A/J	Odet; Shorter3		M		125	25.37	4.95			69	2.719747734	10500000	50.6		0.034366096	291	9
A/J	Odet; Shorter3		M		125	22.27	4.95			66	2.963628199	6000000	52.1		0.035652807	194	7
A/J	Odet; Shorter3		M		125	22.22	4.95			66	2.97029703	4000000	57.2		0.041309458	168	5
A/J	Odet; Shorter3		M		125	23.74	4.95			64	2.695871946	4000000	58.9		0.037099598	186	4
A/J	Odet; Shorter3		M		125	19.94	4.95			64	3.209628887	0			0.041815342	218	2
A/J	Odet; Shorter3		M		125	21.26	4.95			74	3.480714958	0			0.040371004	260	8
A/J	Odet; Shorter3		M		125	24.43	4.95			55	2.251330332	3500000			0.029975137	233	37
A/J	Odet; Shorter3		M		125	27.52	4.95			80	2.906976744	0			0.040463651	256	11
A/J	Odet; Shorter3		M		125	25.4	4.95			77	3.031496063	0			0.042609206	208	3
A/J	Odet; Shorter3		M		125	23.21	4.95			75	3.231365791	0			0.039148193	244	5
A/J	Odet; Shorter3		M		125	23.86	4.95			76	3.185247276	0			0.042536064	216	6
A/J	Odet; Shorter3		M		125	21.8	4.95			46	2.110091743	0			0.03355605	166	5
A/J	Odet; Shorter3		M		125	25.22	4.95			77	3.053132435	8000000	69.3		0.043314572	192	2
A/J	Odet; Shorter3		M		125	28.99	4.95			68	2.345636426	12500000	45.3		0.035679586	186	14
A/J	Odet; Shorter3		M		125	25.33	4.95			50	1.97394394	1500000	50.5		0.032320846	264	34
A/J	Odet; Shorter3		M		125	24.59	4.95			75	3.050020333	4380000	49.1		0.040100798	253	11
A/J	Odet; Shorter3		M		125	25.36	4.95			70	2.760252366	13000000	40.3		0.037236283	223	19
C57BL/6J	Odet; Shorter3		M		125	26.25	5.92			91	3.466666667	0			0.044870237	234	5
C57BL/6J	Odet; Shorter3		M		125	27.07	5.92			98	3.620243812	0			0.045080736	263	1
C57BL/6J	Odet; Shorter3		M		125	26.38	5.92			94	3.563305534	0			0.040642117	255	8
C57BL/6J	Odet; Shorter3		M		125	40.57	5.92			107	2.63741681	22000000	55.7		0.043292441	266	2
C57BL/6J	Odet; Shorter3		M		125	26.65	5.92			108	4.052532833	0			0.048781558	265	5
C57BL/6J	Odet; Shorter3		M		125	35.16	5.92			107	3.043230944	30000000			0.043027319	311	7
C57BL/6J	Odet; Shorter3		M		125	41.64	5.92			107	2.569644573	12500000	58.7		0.045359652	318	11
C57BL/6J	Odet; Shorter3		M		125	26.09	5.92			103	3.947872748	0			0.041598158	233	13
C57BL/6J	Odet; Shorter3		M		125	36.27	5.92			109	3.005238489	23500000	61.3		0.039881039	298	9
C57BL/6J	Odet; Shorter3		M		125	23.64	5.92			102	4.314720812	0			0.044990462	283	7
C57BL/6J	Odet; Shorter3		M		125	30.8	5.92			107	3.474025974	28000000	45.7		0.045472971	278	6
C57BL/6J	Odet; Shorter3		M		125	34.92	5.92			99	2.835051546	24000000	52		0.044405885	274	5
C57BL/6J	Odet; Shorter3		M		125	26.34	5.92			81	3.075170843	24750000	66.2		0.045314364	228	3
C57BL/6J	Odet; Shorter3		M		125	26.13	5.92			72	2.755453502	23000000	66		0.042579942	214	18
C57BL/6J	Odet; Shorter3		M		125	25.58	5.92			79	3.088350274	32750000	57.8		0.04230243	262	5
C57BL/6J	Odet; Shorter3		M		125	26.22	5.92			80	3.051106026	28250000	64.6		0.044757672	219	5
C57BL/6J	Odet; Shorter3		M		125	24.57	5.92			91	3.703703704	0			0.045404962	176	2
C57BL/6J	Odet; Shorter3		M		125	25.8	5.92			87	3.372093023	0			0.042543375	224	12
C57BL/6J	Odet; Shorter3		M		125	29.7	5.92			94	3.164983165	28000000	59.5		0		0
C57BL/6J	Odet; Shorter3		M		125	33.3	5.92			103	3.093093093	40000000	62.4		0		0
C57BL/6J	Odet; Shorter3		M		125	23.1	5.92			96	4.155844156	18300000			0.046354077	264	6
C57BL/6J	Odet; Shorter3		M		125	25.3	5.92			106	4.18972332	50500000			0.048562579	267	11
C57BL/6J	Odet; Shorter3		M		125	26.2	5.92			101	3.854961832	29100000			0.047397865	274	5
C57BL/6J	Odet; Shorter3		M		125	25	5.92			102	4.08	34800000			0.043152414	263	8
C57BL/6J	Odet; Shorter3		M		125	25.6	5.92			87	3.3984375	37600000			0.04410014	256	19
C57BL/6J	Odet; Shorter3		M		125	24.4	5.92			80	3.278688525	14400000			0.041432033	267	17
C57BL/6J	Odet; Shorter3		M		125	28.8	5.92			98	3.402777778	9600000			0.044720182	264	13
C57BL/6J	Odet; Shorter3		M		125	30.4	5.92			99	3.256578947	25800000			0.043877093	292	6
C57BL/6J	Odet; Shorter3		M		125	26.3	5.92			96	3.650190114	27000000			0.049315415	250	1
C57BL/6J	Odet; Shorter3		M		125	27.7	5.92			99	3.57400722	26400000			0.050169277	240	1
C57BL/6J	Odet; Shorter3		M		125	29	5.92			100	3.448275862	24900000			0.049213129	244	3
C57BL/6J	Odet; Shorter3		M		125	30.4	5.92			95	3.125	39900000			0.044750173	251	12
C57BL/6J	Odet; Shorter3		M		125	24.4	5.92			96	3.93442623	33900000			0.041453682	294	8
C57BL/6J	Odet; Shorter3		M		125	30	5.92			103	3.433333333	40800000			0.045231395	237	5
C57BL/6J	Odet; Shorter3		M		125	25	5.92			93	3.72	38400000			0.046392246	238	13
C57BL/6J	Odet; Shorter3		M		125	25.5	5.92			108	4.235294118	35600000			0.046483915	277	10
C57BL/6J	Odet; Shorter3		M		125	25	5.92			110	4.4	36300000			0.045028065	220	1
C57BL/6J	Odet; Shorter3		M		125	27.1	5.92			85	3.136531365	32000000			0.041779106	224	9
C57BL/6J	Odet; Shorter3		M		125		5.92			0		18800000			0		0
C57BL/6J	Odet; Shorter3		M		125		5.92			0		21000000			0		0
CAST/EiJ	Odet; Shorter3		M		125	16.52	4.73			58	3.510895884	0			0.049828435	176	2
CAST/EiJ	Odet; Shorter3		M		125	15.66	4.73			56	3.575989783	0			0.043292441	188	5
CAST/EiJ	Odet; Shorter3		M		125	16.63	4.73			56	3.367408298	0			0.050105777	130	1
CAST/EiJ	Odet; Shorter3		M		125	17.09	4.73			49	2.867173786	5500000	36.4		0.044810185	168	1
CAST/EiJ	Odet; Shorter3		M		125	17.12	4.73			42	2.453271028	7000000	32.7		0.039640707	174	4
CAST/EiJ	Odet; Shorter3		M		125	17.99	4.73			46	2.556976098	6500000	37.4		0.037923475	199	1
CAST/EiJ	Odet; Shorter3		M		125	15.29	4.73			54	3.531720078	10500000	45.5		0.044922816	179	0
CAST/EiJ	Odet; Shorter3		M		125	17.46	4.73			46	2.634593356	6000000	41.9		0.042375371	169	1
CAST/EiJ	Odet; Shorter3		M		125	15.99	4.73			59	3.689806129	0			0.04443577	184	7
CAST/EiJ	Odet; Shorter3		M		125	16.41	4.73			58	3.534430225	0			0.040556404	197	2
CAST/EiJ	Odet; Shorter3		M		125	17.38	4.73			59	3.394706559	0			0.04053499	188	4
CAST/EiJ	Odet; Shorter3		M		125	15.47	4.73			55	3.555268261	0			0.041223044	192	2
CAST/EiJ	Odet; Shorter3		M		125	15.7	4.73			57	3.630573248	0			0.046308295	192	1
CAST/EiJ	Odet; Shorter3		M		125	17.6	4.73			61	3.465909091	7000000			0.043410535	175	0
CAST/EiJ	Odet; Shorter3		M		125	16.4	4.73			54	3.292682927	8500000	45		0.04281434	131	3
CAST/EiJ	Odet; Shorter3		M		125	16.83	4.73			55	3.267973856	0	51.1		0.040634971	203	9
CAST/EiJ	Odet; Shorter3		M		125	15.69	4.73			57	3.632887189	0	53.3		0.043086164	177	2
CAST/EiJ	Odet; Shorter3		M		125	15.78	4.73			56	3.548795944	9960000	47.7		0.046629243	109	4
CAST/EiJ	Odet; Shorter3		M		125	17.43	4.73			57	3.270223752	0	61.1		0.044361076	170	1
CAST/EiJ	Odet; Shorter3		M		125		4.73			52		2250000			0		0
NOD/ShiLtJ	Odet; Shorter3		M		125	26.4	7.33			114	4.318181818	18500000			0.049441451	257	12
NOD/ShiLtJ	Odet; Shorter3		M		125	26.7	7.33			109	4.082397004	44500000			0.052717846	236	14
NOD/ShiLtJ	Odet; Shorter3		M		125	27.6	7.33			114	4.130434783	38400000			0.04970981	287	12
NOD/ShiLtJ	Odet; Shorter3		M		125	28	7.33			71	2.535714286	8800000			0.039323737	265	68
NOD/ShiLtJ	Odet; Shorter3		M		125	27.1	7.33			103	3.800738007	19000000			0.048071677	268	3
NOD/ShiLtJ	Odet; Shorter3		M		125	26	7.33			107	4.115384615	17600000			0.048258393	215	6
NOD/ShiLtJ	Odet; Shorter3		M		125	25.4	7.33			123	4.842519685	45600000			0.047259049	292	23
NOD/ShiLtJ	Odet; Shorter3		M		125	28.8	7.33			100	3.472222222	27600000			0.047846544	284	14
NOD/ShiLtJ	Odet; Shorter3		M		125	34.9	7.33			119	3.40974212	29400000			0.053921103	246	12
NOD/ShiLtJ	Odet; Shorter3		M		125	30.81	7.33			105	3.407984421	17000000	62.6		0.052880757	232	8
NOD/ShiLtJ	Odet; Shorter3		M		125	27.51	7.33			104	3.780443475	13250000	62.3		0.052644618	208	4
NOD/ShiLtJ	Odet; Shorter3		M		125	30.28	7.33			108	3.5667107	11000000	71.8		0.044189517	253	13
NOD/ShiLtJ	Odet; Shorter3		M		125	28.5	7.33			111	3.894736842	18630000	72.2		0.046285413	231	7
NOD/ShiLtJ	Odet; Shorter3		M		125	29.01	7.33			112	3.860737677	28600000	60.9		0.056132937	200	14
NOD/ShiLtJ	Odet; Shorter3		M		125	29.76	7.33			62	2.083333333	4860000	31.1		0.035840471	226	68
NOD/ShiLtJ	Odet; Shorter3		M		125		7.33			0		28000000			0		0
NOD/ShiLtJ	Odet; Shorter3		M		125	31.84	7.33			104	3.266331658	0	71.4		0.061083599	160	18
NOD/ShiLtJ	Odet; Shorter3		M		125		7.33			0		15300000			0		0
NOD/ShiLtJ	Odet; Shorter3		M		125	27.23	7.33			105	3.856041131	0			0.051014454	207	11
NOD/ShiLtJ	Odet; Shorter3		M		125	29.47	7.33			106	3.596878181	0			0.049055974	264	13
NOD/ShiLtJ	Odet; Shorter3		M		125	28.18	7.33			107	3.797019163	0			0.050782525	252	15
NOD/ShiLtJ	Odet; Shorter3		M		125	27.42	7.33			104	3.792851933	0			0.044645249	252	16
NOD/ShiLtJ	Odet; Shorter3		M		125	28.92	7.33			94	3.250345781	17500000	62.6		0.049955125	224	13
NOD/ShiLtJ	Odet; Shorter3		M		125	27.67	7.33			100	3.614022407	0			0.052897061	196	6
NOD/ShiLtJ	Odet; Shorter3		M		125	31.26	7.33			101	3.230966091	0	57.8		0.045450296	231	29
NOD/ShiLtJ	Odet; Shorter3		M		125	27.37	7.33			107	3.909389843	0			0.051447729	256	9
NOD/ShiLtJ	Odet; Shorter3		M		125	27.2	7.33			103	3.786764706	0			0.045996058	260	6
NOD/ShiLtJ	Odet; Shorter3		M		125	30.54	7.33			106	3.470857891	24000000	67.9		0.050288449	233	15
NZO/HlLtJ	Odet; Shorter3		M		125	39.9	5.81			85	2.130325815	10000000			0.035318918	288	15
NZO/HlLtJ	Odet; Shorter3		M		125	51.8	5.81			99	1.911196911	14700000			0.041598158	234	2
NZO/HlLtJ	Odet; Shorter3		M		125		5.81			0		9800000			0		0
NZO/HlLtJ	Odet; Shorter3		M		125		5.81			0		12200000			0		0
NZO/HlLtJ	Odet; Shorter3		M		125	58.99	5.81			102	1.729106628	43600000	43.6		0.039513766	312	1
NZO/HlLtJ	Odet; Shorter3		M		125		5.81			0		19800000			0		0
NZO/HlLtJ	Odet; Shorter3		M		125	62.1	5.81			94	1.513687601	17560000	61.1		0.046736471	212	5
NZO/HlLtJ	Odet; Shorter3		M		125	38.63	5.81			96	2.485115195	15630000	61.3		0.04138875	279	1
NZO/HlLtJ	Odet; Shorter3		M		125	42.35	5.81			105	2.479338843	15380000	52.2		0.042660443	258	1
NZO/HlLtJ	Odet; Shorter3		M		125	39.27	5.81			97	2.470078941	15630000	52		0.040278463	288	0
NZO/HlLtJ	Odet; Shorter3		M		125	42.09	5.81			98	2.328344025	30250000	48.1		0.042054899	274	1
NZO/HlLtJ	Odet; Shorter3		M		125	40.96	5.81			0		0			0		0
NZO/HlLtJ	Odet; Shorter3		M		153	62.46	5.81			94	1.504963176	20600000	46.7		0.038742443	273	9
NZO/HlLtJ	Odet; Shorter3		M		125	57.28	5.81			109	1.902932961	37400000	62.6		0.049630806	247	2
NZO/HlLtJ	Odet; Shorter3		M		125	46.38	5.81			101	2.177662786	28000000	60.8		0.041359908	326	1
NZO/HlLtJ	Odet; Shorter3		M		125	41.21	5.81			0		0			0		0
NZO/HlLtJ	Odet; Shorter3		M		125	40.16	5.81			0		0			0		0
NZO/HlLtJ	Odet; Shorter3		M		125	60.23	5.81			73	1.212020588	9000000	41.1		0.037325262	245	82
NZO/HlLtJ	Odet; Shorter3		M		125	57.82	5.81			103	1.781390522	12500000	40		0.042792338	207	2
NZO/HlLtJ	Odet; Shorter3		M		125	44.39	5.81			96	2.162649245	0	43.2		0.040928479	247	4
NZO/HlLtJ	Odet; Shorter3		M		125	78.24	5.81			123	1.57208589	17500000	47.4		0.041627083	269	5
NZO/HlLtJ	Odet; Shorter3		M		125	44.5	5.81			0		0			0		0
NZO/HlLtJ	Odet; Shorter3		M		125	46	5.81			101	2.195652174	0			0.040321161	285	3
NZO/HlLtJ	Odet; Shorter3		M		125	42.79	5.81			96	2.24351484	27000000	55.4		0.037366366	300	2
NZO/HlLtJ	Odet; Shorter3		M		125	48.18	5.81			0		0			0		0
NZO/HlLtJ	Odet; Shorter3		M		125	44.08	5.81			0		0			0		0
NZO/HlLtJ	Odet; Shorter3		M		125	49.87	5.81			101	2.025265691	20000000	48.5		0.039591317	278	1
NZO/HlLtJ	Odet; Shorter3		M		125	37.64	5.81			91	2.417640808	29000000	48.3		0.039499675	221	4
NZO/HlLtJ	Odet; Shorter3		M		125	42.33	5.81			98	2.315142925	26500000	50		0.0345833	164	5
NZO/HlLtJ	Odet; Shorter3		M		125	45.31	5.81			99	2.184948135	10000000	62.4		0.035545792	302	2
NZO/HlLtJ	Odet; Shorter3		M		125	53.57	5.81			105	1.960052268	24500000	60.7		0.03384238	318	1
NZO/HlLtJ	Odet; Shorter3		M		125	45.03	5.81			0		0			0		0
NZO/HlLtJ	Odet; Shorter3		M		125	42.02	5.81			0		0			0		0
PWK/PhJ	Odet; Shorter3		M		125	14.9	4.63			83	5.570469799	19800000			0.054085861	194	5
PWK/PhJ	Odet; Shorter3		M		125	17.5	4.63			95	5.428571429	14300000			0.061478493	203	5
PWK/PhJ	Odet; Shorter3		M		125	18.21	4.63			82	4.503020319	22750000	81.6		0.053641592	179	9
PWK/PhJ	Odet; Shorter3		M		125	16.6	4.63			74	4.457831325	23000000	73.3		0.0494651	178	13
PWK/PhJ	Odet; Shorter3		M		125	15.71	4.63			74	4.710375557	0	74.8		0.054383058	164	3
PWK/PhJ	Odet; Shorter3		M		125	17.63	4.63			0		0			0		0
PWK/PhJ	Odet; Shorter3		M		125	18.08	4.63			0		0			0		0
PWK/PhJ	Odet; Shorter3		M		125	18.23	4.63			0		0			0		0
PWK/PhJ	Odet; Shorter3		M		125	19.8	4.63			99	5	0			0.050407762	224	10
PWK/PhJ	Odet; Shorter3		M		125	17.41	4.63			84	4.824813326	0			0.051923218	219	8
PWK/PhJ	Odet; Shorter3		M		125	18.95	4.63			25	1.319261214	0			0.019167397	192	0
PWK/PhJ	Odet; Shorter3		M		125	18.58	4.63			85	4.574811625	0			0.048820713	237	7
PWK/PhJ	Odet; Shorter3		M		125	18.51	4.63			84	4.53808752	0			0.052840005	215	9
PWK/PhJ	Odet; Shorter3		M		125	19.81	4.63			78	3.937405351	13000000	67.8		0.055630144	175	19
PWK/PhJ	Odet; Shorter3		M		125	16.71	4.63			62	3.710353082	10000000	88.6		0.045631854	150	16
PWK/PhJ	Odet; Shorter3		M		125	21.73	4.63			87	4.003681546	21500000	67.9		0.055162912	150	17
PWK/PhJ	Odet; Shorter3		M		125	24.88	4.63			97	3.898713826	11500000	77.5		0.044167164	222	37
PWK/PhJ	Odet; Shorter3		M		125	19.68	4.63			47	2.388211382	5500000	67.2		0.039429253	148	24
PWK/PhJ	Odet; Shorter3		M		125	16.62	4.63			90	5.415162455	14000000			0.053666225	201	13
PWK/PhJ	Odet; Shorter3		M		125	20.34	4.63			88	4.326450344	16000000	84.8		0.05231167	206	13
PWK/PhJ	Odet; Shorter3		M		125	19.28	4.63			98	5.082987552	19200000	73.2		0		0
PWK/PhJ	Odet; Shorter3		M		125	19.67	4.63			101	5.134722928	15000000	65.1		0		0
PWK/PhJ	Odet; Shorter3		M		125	19.86	4.63			95	4.783484391	14040000	62.9		0		0
WSB/EiJ	Odet; Shorter3		M		125	16.7	3.65			58	3.473053892	3500000			0.03656893	171	29
WSB/EiJ	Odet; Shorter3		M		125	16.4	3.65			61	3.719512195	19800000			0.041072038	180	35
WSB/EiJ	Odet; Shorter3		M		125	17.5	3.65			64	3.657142857	19500000			0.042961165	177	44
WSB/EiJ	Odet; Shorter3		M		125	17.9	3.65			67	3.74301676	23200000			0.032429279	225	76
WSB/EiJ	Odet; Shorter3		M		125	12.4	3.65			44	3.548387097	7600000			0.03631854	212	19
WSB/EiJ	Odet; Shorter3		M		125	16.2	3.65			63	3.888888889	15400000			0.045737931	216	26
WSB/EiJ	Odet; Shorter3		M		125	14.3	3.65			53	3.706293706	6200000			0.048375274	143	22
WSB/EiJ	Odet; Shorter3		M		125	15.4	3.65			67	4.350649351	12400000			0.037318414	260	48
WSB/EiJ	Odet; Shorter3		M		125	23.18	3.65			80	3.451251079	39500000	92.5		0.045828952	247	59
WSB/EiJ	Odet; Shorter3		M		125	17.71	3.65			65	3.670242801	14000000	67.3		0.035412249	236	100
WSB/EiJ	Odet; Shorter3		M		125	17.48	3.65			63	3.604118993	8000000	74.8		0.038470799	165	32
WSB/EiJ	Odet; Shorter3		M		125	20.57	3.65			77	3.743315508	42500000	89.1		0.047583269	231	56
WSB/EiJ	Odet; Shorter3		M		125	17.98	3.65			72	4.004449388	10000000	85.1		0.035706375	238	58
WSB/EiJ	Odet; Shorter3		M		125	19.92	3.65			73	3.664658635	6500000	91.2		0.037537873	177	64
WSB/EiJ	Odet; Shorter3		M		125	15.49	3.65			63	4.06714009	13000000	71.1		0.047567805	166	20
WSB/EiJ	Odet; Shorter3		M		125	18.28	3.65			68	3.719912473	12500000	50.9		0.035278957	157	45
WSB/EiJ	Odet; Shorter3		M		125	15.54	3.65			29	1.866151866	0			0.035579217	222	68
WSB/EiJ	Odet; Shorter3		M		125	12.34	3.65			55	4.457050243	10000000	65.7		0.040157608	120	13
WSB/EiJ	Odet; Shorter3		M		125	15	3.65			55	3.666666667	15000000	67.6		0.032053733	149	102
WSB/EiJ	Odet; Shorter3		M		125	13.74	3.65			59	4.294032023	8000000	62.4		0.040406625	187	18
WSB/EiJ	Odet; Shorter3		M		125	12.38	3.65			58	4.684975767	9000000	59.3		0.044817689	127	16
WSB/EiJ	Odet; Shorter3		M		125	15.62	3.65			42	2.688860435	0			0.032053733	190	106
WSB/EiJ	Odet; Shorter3		M		164	12.94	3.65			62	4.791344668	34000000	91.7		0.041295049	165	24
WSB/EiJ	Odet; Shorter3		M		125	15.73	3.65			54	3.432930706	0			0.03606901	218	49
WSB/EiJ	Odet; Shorter3		M		125	15.73	3.65			55	3.496503497	0			0.037325262	194	49
WSB/EiJ	Odet; Shorter3		M		125	26.45	3.65			58	2.192816635	28200000	82.2		0.035312257	191	188
WSB/EiJ	Odet; Shorter3		M		125	17.65	3.65			0		0			0		0
WSB/EiJ	Odet; Shorter3		M		125	17.64	3.65			67	3.798185941	15000000	77.1		0.038241693	225	32
WSB/EiJ	Odet; Shorter3		M		125	19.08	3.65			57	2.987421384	16000000	77.4		0.034438421	202	65
WSB/EiJ	Odet; Shorter3		M		125	16.02	3.65			60	3.745318352	9000000	55.2		0.037400636	207	49
WSB/EiJ	Odet; Shorter3		M		125	16.21	3.65			0		0			0		0
WSB/EiJ	Odet; Shorter3		M		125	17.97	3.65			38	2.114635504	7000000	52.3		0.044196969	193	33
CC001/Unc	Shorter4		M			30.423	5.409090909	90	93	92	3.024027874	9200000	26.6	62					0.4548105	0.4310464	0.4787295	0.000198433	1
CC001/Unc	Shorter4		M			30.318	5.409090909	75	87	81	2.67168019	6400000							0.4548105	0.4310464	0.4787295	0.000198433	1
CC001/Unc	Shorter4		M			29.946	5.409090909	84	86	85	2.83844253	16200000	50.2	72					0.4548105	0.4310464	0.4787295	0.000198433	1
CC001/Unc	Shorter4		M			30.065	5.409090909	73	93	83	2.760685182	28400000	26.7						0.4548105	0.4310464	0.4787295	0.000198433	1
CC002/Unc	Shorter4		M			28.452	3.787234043	152	154	153	5.377477857	14500000	33.9	43					0.4813654	0.4629413	0.4998275	0.04787749	1
CC002/Unc	Shorter4		M			34.495	3.787234043	91	92	92	2.667053196	2200000	5.4	24					0.4813654	0.4629413	0.4998275	0.04787749	1
CC002/Unc	Shorter4		M			28.209	3.787234043	155	156	156	5.530149952	26000000	28.6	85					0.4813654	0.4629413	0.4998275	0.04787749	1
CC002/Unc	Shorter4		M			23.591	3.787234043	124	125	125	5.298630834	31400000	13.7	78					0.4813654	0.4629413	0.4998275	0.04787749	1
CC003/Unc	Shorter4		M			39.598	3.078125	80	75	78	1.969796454	37800000	52.4	84					0.4150418	0.3635661	0.4679305	0.001506741	1
CC003/Unc	Shorter4		M			30.298	3.078125	78	78	78	2.574427355	17800000	35.5	82					0.4150418	0.3635661	0.4679305	0.001506741	1
CC003/Unc	Shorter4		M			31.394	3.078125	87	83	85	2.707523731	33600000	55.1	37					0.4150418	0.3635661	0.4679305	0.001506741	1
CC008/GeniUnc	Shorter4		M			30.261	2.619047619	113	113	113	3.734179307	35200000	65.6	59					0.5172414	0.4075227	0.625753	0.830373	0
CC008/GeniUnc	Shorter4		M			31.277	2.619047619	119	121	120	3.836685104	24000000	51.3	81					0.5172414	0.4075227	0.625753	0.830373	0
CC010/GeniUnc	Shorter4		M			29.536	3.571428571	28	97	63	2.132990249	27800000	16	66					0.4986911	0.4733168	0.5240704	0.9388284	0
CC010/GeniUnc	Shorter4		M			31.147	3.571428571	53	51	52	1.669502681	900000	13.6	18					0.4986911	0.4733168	0.5240704	0.9388284	0
CC010/GeniUnc	Shorter4		M			29.845	3.571428571	72	80	76	2.546490199	11900000	45.3	40					0.4986911	0.4733168	0.5240704	0.9388284	0
CC010/GeniUnc	Shorter4		M			33.119	3.571428571	65	60	63	1.902231348	26000000	13.9	71					0.4986911	0.4733168	0.5240704	0.9388284	0
CC011/Unc	Shorter4		M			30.294	5.25	87	90	89	2.937875487	7900000	38.5	69					0.5378151	0.4918594	0.5832983	0.1085677	0
CC011/Unc	Shorter4		M			30.576	5.25	126	139	133	4.34981685	32200000	45.6	61					0.5378151	0.4918594	0.5832983	0.1085677	0
CC011/Unc	Shorter4		M			27.026	5.25	123	120	122	4.514171539	14100000	25	54					0.5378151	0.4918594	0.5832983	0.1085677	0
CC013/GeniUnc	Shorter4		M			33.388	6.045454545	110	132	121	3.624056547	31200000	60.8	60					0.5461847	0.5096901	0.5823134	0.01279465	2
CC013/GeniUnc	Shorter4		M			35.949	6.045454545	117	98	108	3.004256029	1900000	75.3	91					0.5461847	0.5096901	0.5823134	0.01279465	2
CC013/GeniUnc	Shorter4		M			36.806	6.045454545	93	71	82	2.227897625	0	56.3	64					0.5461847	0.5096901	0.5823134	0.01279465	2
CC018/Unc	Shorter4		M			26.748	3.646153846	92	101	97	3.62643936	29200000	58	87					0.4645799	0.4243357	0.5051703	0.088162	0
CC018/Unc	Shorter4		M			27.714	3.646153846	103	104	104	3.752616006	40500000	51.7	88					0.4645799	0.4243357	0.5051703	0.088162	0
CC018/Unc	Shorter4		M			25.952	3.646153846	105	102	104	4.007398274	18100000	58.9	96					0.4645799	0.4243357	0.5051703	0.088162	0
CC021/Unc	Shorter4		M			19.987		75	77	76	3.802471607	12100000	55.2	82
CC021/Unc	Shorter4		M			21.967		82	81	82	3.732872035	26600000	44.6	88
CC021/Unc	Shorter4		M			22.395		92	96	94	4.197365483	32800000	30.4	83
CC021/Unc	Shorter4		M			23.073		80	88	84	3.640618905	42000000	46.7	41
CC021/Unc	Shorter4		M			23.566		82	93	88	3.734193329	46200000	44.2	92
CC021/Unc	Shorter4		M			24.88		106	112	109	4.381028939	24800000	41.6	96
CC021/Unc	Shorter4		M			28.477		135	136	136	4.775783966	53100000	18.7	98
CC034/Unc	Shorter4		M			28.848		105	96	101	3.501109262	40200000	54.3	97
CC034/Unc	Shorter4		M			22.97		92	97	95	4.135829343	24800000	53.4	86
CC034/Unc	Shorter4		M			24.131		111	96	104	4.309808959	24200000	50.2	90
CC034/Unc	Shorter4		M			20.365		96	95	96	4.713970047	10500000	56.1	52
CC053/Unc	Shorter4		M			23.064		116	121	119	5.159556018	13000000	52	73
CC053/Unc	Shorter4		M			22.832		118	135	127	5.562368605	30200000	65.6	88
CC065/Unc	Shorter4		M			28.398	4.538461538	73	76	75	2.641031059	37600000	35.7	83					0.6742424	0.6140931	0.7304267	1.54E-08	2
CC065/Unc	Shorter4		M			22.87	4.538461538	69	63	66	2.885876694	33200000	33.6	78					0.6742424	0.6140931	0.7304267	1.54E-08	2
